RESEARCH ARTICLE

# Association between HbA1c and carotid atherosclerosis among elderly Koreans with normal fasting glucose

Seung Won Lee<sup>1,2</sup>, Hyeon Chang Kim<sup>2,3\*</sup>, Yong-ho Lee<sup>4</sup>, Bo Mi Song<sup>1,2</sup>, Hansol Choi<sup>1</sup>, Ji Hye Park<sup>1</sup>, Yumie Rhee<sup>4</sup>, Chang Oh Kim<sup>4\*</sup>

**1** Department of Public Health, Yonsei University Graduate School, Seoul, Republic of Korea, **2** Cardiovascular and Metabolic Diseases Etiology Research Center, Yonsei University College of Medicine, Seoul, Korea, **3** Department of Preventive Medicine, Yonsei University College of Medicine, Seoul, Korea, **4** Department of Internal Medicine, Yonsei University College of Medicine, Seoul, Korea

\* [hckim@yuhs.ac](mailto:hckim@yuhs.ac) (HCK); [cokim@yuhs.ac](mailto:cokim@yuhs.ac) (COK)

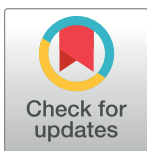

## Abstract

### Aim

We examined whether glycated haemoglobin (HbA1c) is associated to carotid atherosclerosis in an elderly Korean population with normal fasting glucose.

### Methods

Using data from the Korean Urban Rural Elderly study, we conducted a cross-sectional analysis of 1,133 participants (335 men and 798 women) with a mean age of 71.8 years. All participants had fasting blood glucose less than 100mg/dL (5.6 mmol/L) and HbA1c level below 6.5% (48 mmol/mol). They were also free from a history of cardiovascular disease, known type 2 diabetes mellitus or use of anti-diabetes medications. Carotid atherosclerosis was assessed by intima-media thickness (IMT) using ultrasonography. The association between HbA1c and carotid IMT was investigated using multivariable linear regression analysis.

### Results

HbA1c levels were independently and positively associated with carotid IMT ( $\beta = 0.020$ ,  $p = 0.045$ ) after adjusting for sex, age, body mass index, systolic blood pressure, diastolic blood pressure, triglyceride, LDL cholesterol, smoking and alcohol intake. However, fasting insulin and glucose levels were not associated with carotid IMT.

### Conclusion

HbA1c levels were positively associated with carotid atherosclerosis, as assessed by carotid IMT, in an elderly population with normoglycemia. Our study suggested that higher HbA1c level is an effective and informative marker of carotid atherosclerosis in an elderly population.

## OPEN ACCESS

**Citation:** Lee SW, Kim HC, Lee Y-h, Song BM, Choi H, Park JH, et al. (2017) Association between HbA1c and carotid atherosclerosis among elderly Koreans with normal fasting glucose. PLoS ONE 12 (2): e0171761. doi:10.1371/journal.pone.0171761

**Editor:** Petter Bjornstad, University of Colorado Denver School of Medicine, UNITED STATES

**Received:** July 23, 2016

**Accepted:** January 25, 2017

**Published:** February 8, 2017

**Copyright:** © 2017 Lee et al. This is an open access article distributed under the terms of the [Creative Commons Attribution License](https://creativecommons.org/licenses/by/4.0/), which permits unrestricted use, distribution, and reproduction in any medium, provided the original author and source are credited.

**Data availability statement:** The authors confirm that all data underlying the findings are fully available without restriction. All relevant data are within the paper and its Supporting Information file.

**Funding:** This work was supported by the Korea Centers for Disease Control and Prevention (2012-E63001-001, 2013-E63007-00); and the Korean Health Technology R&D Project, Ministry of Health & Welfare, Korea (HI13C0715). The funders had no role in study design, data collection and analysis,

decision to publish, or preparation of the manuscript.

**Competing interests:** The authors have declared that no competing interests exist.

**Abbreviations:** BMI, body mass index; CRP, C-reactive protein; DBP, diastolic blood pressure; HOMA-IR, homeostasis model assessment of insulin resistance; HDL, high-density lipoprotein; IMT, intima-media thickness; KURE, Korean Urban Rural Elderly; LDL, Low-density lipoprotein; SBP, Systolic blood pressure.

## Introduction

Glycated hemoglobin (HbA1c) is an well-known indicator used to assess long-term control of diabetes, and HbA1c level has been used as a diagnostic or screening tool for type 2 diabetes mellitus[1]. Previous studies showed positive associations of HbA1c levels with cardiovascular disease and mortality in those with diabetes mellitus[2–5]. Microvascular complications, such as nephropathy and retinopathy, are also associated with HbA1c[6]. Studies also observed a relationship between HbA1c and atherosclerosis among people with and without diabetes[7–9]. Carotid intima-media thickness (IMT) is known as a highly reproducible and non-invasive method to access atherosclerotic process[10–12]. Increased carotid IMT is also a predictor of atherosclerotic cardiovascular disease such as stroke and myocardial infarction[13–16]. Previous intervention studies reported that there were reductions of carotid IMT in patients with lipid-lowering drugs compared with a placebo group[17,18]. In people with diagnosed and unrecognized diabetes, HbA1c was independently related to carotid IMT[9]. Interestingly, HbA1c levels were positively associated with carotid IMT in the people with normoglycemia as well[7,8]. However, the association was not clear in the Asian population[7,8]. In an elderly Asian population with normal fasting glucose levels, the association between HbA1c and subclinical carotid atherosclerosis has not been fully investigated. Thus, in the current study, we evaluated the association between HbA1c and carotid IMT in an elderly Korean population with normal fasting glucose.

## Materials and methods

### Study population

This study analyzed baseline data in 2012 and 2013 from the Korean Urban Rural Elderly (KURE) study which is a community-based cohort study. The procedures of data collection in KURE have been described elsewhere in detail [19,20]. During the summers (June to September) of 2012 and 2013, a total of 2,025 participants aged more than 65 years were enrolled from urban and rural communities. All participants conducted questionnaire interview and health examination as a prescribed protocol. Among the 2,025 participants, based on the results of physical examination, people who had a fasting glucose level < 100 mg/dL (5.6 mmol/L) and an HbA1c level < 6.5% (48 mmol/mol) were included in the current analysis. Those with a history of major cardiovascular disease such as myocardial infarction or stroke ( $n = 273$ ) or who were under treatment for diabetes ( $n = 349$ ) were excluded from the current analysis. People who had missing important covariate data ( $n = 5$ ) were also excluded. Finally, a total of 1,133 participants were included in the current analysis. All participants provided written informed consent forms and study protocol was approved by the Institutional Review Board of Severance Hospital at Yonsei University College of Medicine (approval number: 4-2012-0172; approval date: May 3, 2012). at the beginning of the study.

### Questionnaire data

The KURE study collected information on demographics, medical history, and lifestyle using standardized questionnaires. All interviewers were trained and performed the questionnaire surveys according to the prescribed procedure. Smoking status of participants was categorized as current smokers or current nonsmokers. Alcohol intake was classified in the current study as regular alcohol consumption (once a week or more) or other (less than once a week).

### Physical examination

The methods for physical examination in the KURE were previously reported in detail elsewhere[19,21,22]. All participants wore identical hospital gown for physical examination. A

trained research examiner made anthropometric measurements including standing height (cm), body weight (kg) and waist circumferences as described previously and body mass index (BMI) was calculated [23]. Resting systolic and diastolic blood pressures (SBP and DBP) were measured more than twice using automatic sphygmomanometer (Omron HEM-7111, Omron Healthcare, Kyoto, Japan). Prior to each measurement, participants had rested for at least five minutes in sitting position. If the first and second measurements differ by  $\geq 10$  mmHg for either SBP or DBP, an additional measurement was performed, and the average of the last two measurements was used for analysis. Carotid IMT were measured by high-resolution B-mode ultrasonography using an 8-MHz linear probe (L5-13IS, Samsung Medicine, Seoul, Korea) in both carotid arteries. Both left and right carotid arteries were examined at levels of the distal common carotid artery, 1.0 cm proximal to the carotid bulb, and the proximal internal carotid artery in both transverse and longitudinal orientations by a single technician as a prescribed protocol[24]. The IMT was defined as the distance between the adventitia-media interface and intima-lumen interface[19]. IMT measurements were performed at all three segments providing a total of 6 measurements per person. The maximum value of the 6 measurements from the bilateral IMTs was used in the analysis. All scans were digitally stored for subsequent off-line analysis. One end-diastolic frame (captured adjacent to the R wave on a continuously recorded ECG) for each interrogation angle was selected and analyzed for mean and maximum IMT. Carotid IMT was analyzed as markers of carotid atherosclerosis. We reported previously that inter-rater reliability of carotid IMT in our clinical centers. The inter-rater reliability of carotid IMT measurements among three clinical centers turned out to be high (calculated intraclass correlation coefficient 0.647 [95% CI: 0.487–0.779] for maximum carotid IMT) [25].

## Laboratory assays

After at least eight hours of fast, blood samples were collected from the antecubital vein in the morning. Fasting blood glucose level was determined by a colorimetry method (ADVIA 1800, Siemens, USA). Insulin level was measured by a chemiluminescence immunoassay (Centaur XP, Siemens, USA). Homeostasis model assessment of insulin resistance (HOMA-IR) was used to evaluate insulin resistance:  $\text{HOMA-IR} = \text{fasting plasma glucose (mg/dL)} \times \text{fasting insulin } (\mu\text{IU/mL})/405$ [26]. An enzymatic method (ADVIA 1800, Siemens, USA) was used to assess total cholesterol, high-density lipoprotein (HDL) cholesterol and triglycerides. C-reactive protein (CRP) concentration was assessed by a turbidometric immunoassay (ADVIA 1800, Wako, Japan). Low-density lipoprotein (LDL) cholesterol was calculated according to the Friedewald formula:  $\text{LDL cholesterol} = \text{Total cholesterol} - \text{HDL cholesterol} - (\text{triglycerides}/5)$  (all concentrations in mg/dL)[27]. HbA1c levels were measured by high-performance liquid chromatography using the VARIANT II system (Bio-Rad, Hercules, CA, USA).

## Statistical analysis

Gender differences in general characteristics were assessed by an independent t-test, Wilcoxon rank sum test, or chi-square test. Fasting insulin, HOMA-IR and CRP levels were log-transformed for parametric testing due to a right-skewed distribution. The relationships between interesting variables and other variables were evaluated using Pearson correlation analysis along with scatter plots.

In order to investigate an independent association between HbA1c and carotid IMT, we used multivariable linear regression analyses. Confounders were selected based on previous studies: sex, age, waist circumference, SBP, DBP, triglycerides, LDL cholesterol, HOMA-IR, smoking status, and alcohol intake. We also tested for the presence of effect modification by

sex including interaction term in separate models. All analyses were performed using SAS statistical software, version 9.4 (SAS Institute, Cary, NC, USA), and all statistical tests were two-sided and *p* value less than 0.05 was considered significant.

## Results

The general characteristics of the study population are shown in Table 1. In this study, a total of 1,133 participants with a mean age of 71.8 years, consisting of 335 men and 798 women, were included. The mean HbA1c level was 5.5% (37 mmol/mol) and mean carotid IMT was 0.9 mm. Men tended to have a higher SBP, DBP, and waist circumference. However, men also had higher levels of HbA1c, insulin, lipid profiles, HOMA IR and CRP than women.

Table 2 shows the correlations of carotid IMT and other variables. HbA1c was significantly and positively correlated with carotid IMT after adjusting for sex and age. Conversely, fasting glucose and insulin levels were not associated with carotid IMT after adjusting for age. The unadjusted association between HbA1c and carotid IMT is also showed by scatter plots, separately for men and women (Fig 1). The positive association between HbA1c and carotid IMT was more prominent in men than in women.

Table 3 shows the relationship between HbA1c and carotid IMT in multivariable linear regression models. HbA1c was positively associated with carotid IMT ( $\beta = 0.026, p = 0.009$ ). The positive association between HbA1c and carotid IMT was not affected by adjustment for sex, body mass index (BMI), SBP, DBP, triglyceride, LDL cholesterol, HOMA-IR, smoking, and alcohol consumption ( $\beta = 0.020, p = 0.045$ ). The interactions between sex and HbA1c for carotid IMT was not significant ( $p = 0.3374$ ). However, when examining this association for

**Table 1. General characteristics of the study population.**

| Variables                | Total (n = 1,133) |   |           | Men (n = 335) |   |           | Women (n = 798) |   |           | <i>p</i> value <sup>a</sup> |
|--------------------------|-------------------|---|-----------|---------------|---|-----------|-----------------|---|-----------|-----------------------------|
| Age, years               | 71.8              | ± | 4.8       | 72.7          | ± | 4.9       | 71.4            | ± | 4.8       | < .001                      |
| BMI, kg/m <sup>2</sup>   | 23.8              | ± | 2.9       | 23.3          | ± | 2.8       | 24.1            | ± | 3.0       | < .001                      |
| Waist circumference, cm  | 82.6              | ± | 8.6       | 84.3          | ± | 8.6       | 81.9            | ± | 8.5       | < .001                      |
| SBP, mmHg                | 127.2             | ± | 15.2      | 128.6         | ± | 14.5      | 126.7           | ± | 15.4      | 0.044                       |
| DBP, mmHg                | 72.9              | ± | 8.4       | 73.8          | ± | 8.5       | 72.5            | ± | 8.4       | 0.015                       |
| Carotid IMT, mm          | 0.9               | ± | 0.1       | 0.9           | ± | 0.1       | 0.8             | ± | 0.1       | < .001                      |
| Fasting glucose, mg/dL   | 88.5              | ± | 6.2       | 88.4          | ± | 6.4       | 88.6            | ± | 6.1       | 0.646                       |
| Fasting insulin, mg/dL   | 5.1               |   | [3.7–7.5] | 4.3           |   | [3.1–6.3] | 5.5             |   | [3.9–8.0] | 0.007                       |
| HbA1c, %                 | 5.5               | ± | 0.3       | 5.4           | ± | 0.3       | 5.5             | ± | 0.3       | 0.028                       |
| Total cholesterol, mg/dL | 188.5             | ± | 34.7      | 178.7         | ± | 30.3      | 192.6           | ± | 35.7      | 0.292                       |
| HDL cholesterol, mg/dL   | 51.7              | ± | 12.3      | 48.2          | ± | 11.2      | 53.1            | ± | 12.4      | 0.003                       |
| LDL cholesterol, mg/dL   | 111.6             | ± | 30.2      | 106.3         | ± | 27.0      | 113.9           | ± | 31.3      | < .001                      |
| Triglyceride, mg/dL      | 126.0             | ± | 61.1      | 121.3         | ± | 58.1      | 127.9           | ± | 62.2      | < .001                      |
| HOMA-IR                  | 1.1               |   | [0.8–1.7] | 0.9           |   | [0.7–1.4] | 1.2             |   | [0.8–1.8] | < .001                      |
| CRP, mg/L                | 0.7               |   | [0.4–1.4] | 0.8           |   | [0.4–1.5] | 0.7             |   | [0.4–1.4] | < .001                      |
| Smoking, current         | 72                |   | (6.4)     | 59            |   | (17.7)    | 13              |   | (1.6)     | < .001                      |
| Alcohol intake, current  | 394               |   | (34.8)    | 186           |   | (55.7)    | 208             |   | (26.1)    | < .001                      |

Values are presented as mean ± standard deviation, median [interquartile range], or number (%).

<sup>a</sup>*P* values for comparison of gender characteristics are based independent t-test, the Wilcoxon rank sum test, or chi-square test.

*P* values compare men and women using independent t-test, the Wilcoxon rank sum test, or chi-square test.

Abbreviations: BMI, body mass index; CRP, C-reactive protein; DBP, diastolic blood pressure; HDL, high-density lipoprotein; HOMA-IR, homeostasis model assessment of insulin resistance; IMT, intima-media thickness; LDL, low-density lipoprotein; SBP, systolic blood pressure

doi:10.1371/journal.pone.0171761.t001

**Table 2. Correlation of carotid IMT with other variables.**

| Total (n = 1,133)             | Simple Correlation   |         | Partial Correlation <sup>a</sup> |         |
|-------------------------------|----------------------|---------|----------------------------------|---------|
|                               | Pearson coefficients | p value | Pearson coefficients             | p value |
| Age                           | 0.168                | < .001  |                                  |         |
| BMI                           | 0.081                | 0.006   | 0.110                            | < .001  |
| Waist circumference           | 0.135                | < .001  | 0.120                            | < .001  |
| SBP                           | 0.132                | < .001  | 0.104                            | < .001  |
| DBP                           | - 0.019              | 0.527   | - 0.011                          | 0.711   |
| HbA1c                         | 0.077                | 0.009   | 0.084                            | 0.005   |
| Fasting glucose               | - 0.014              | 0.644   | - 0.015                          | 0.623   |
| Fasting insulin (logarithmic) | - 0.007              | 0.820   | 0.019                            | 0.514   |
| Total cholesterol             | 0.053                | 0.075   | 0.081                            | 0.006   |
| HDL cholesterol               | - 0.123              | < .001  | - 0.105                          | < .001  |
| LDL cholesterol               | 0.080                | 0.007   | 0.102                            | < .001  |
| Triglycerides                 | 0.076                | 0.011   | 0.079                            | 0.008   |
| HOMA-IR (logarithmic)         | - 0.008              | 0.794   | 0.017                            | 0.561   |
| CRP (logarithmic)             | 0.058                | 0.049   | 0.049                            | 0.098   |
| Smoking                       | 0.037                | 0.208   | < .001                           | 0.996   |
| Alcohol intake                | - 0.002              | 0.930   | - 0.018                          | 0.541   |

<sup>a</sup>Partial correlation analysis with adjustment for sex and age.

Abbreviations: BMI, body mass index; CRP, C-reactive protein; DBP, diastolic blood pressure; HDL, high-density lipoprotein; HOMA-IR, homeostasis model assessment of insulin resistance; IMT, intima-media thickness; LDL, low-density lipoprotein; SBP, systolic blood pressure.

doi:10.1371/journal.pone.0171761.t002

men and women separately, the association between HbA1c and carotid IMT was not significant in women.

## Discussion

We investigated the association between HbA1c and carotid IMT in among elderly Koreans with a normal fasting glucose. HbA1c was positively related to carotid IMT. The association between HbA1c and carotid IMT was significant before and after adjustment for covariates, particularly in men. Although there are a significant relationship between HbA1c and carotid IMT only for men in our study, there is a significant relationship between HbA1c and carotid IMT in total population and the interaction test for sex was not significant ( $p = 0.3374$ ). In our study, carotid IMT was defined by maximum thickness value. The average thickness value was not significantly associated with HbA1c as well as fasting glucose and insulin contrary to maximum thickness value in our study. We could not elucidate the reason, there is a possibility linking the characteristics of study population. Our study population was relatively healthy and without major cardiovascular disease such as myocardial infarction or stroke and diabetes mellitus. They might be still early stages of carotid atherosclerosis.

Previous researches have investigated the association between HbA1c and atherosclerosis assessed by carotid IMT in persons without diabetes [8,28–30]. A positive association was reported in several cross-sectional studies on diverse ethnic groups, including American, German, Chinese, and Asian Indians [7,8,28,31]. A consistent association was also observed in our study participants who were elderly and non-obese. Previous studies analyzed relatively young (40–60 years) and obese (BMI > 25 kg/m<sup>2</sup>) participants, unique from our patient pool [7,8,28,31]. However, a previous Korean study among people without diabetes HbA1c was not associated with carotid IMT and plaque, but HbA1c was positively associated with brachial-

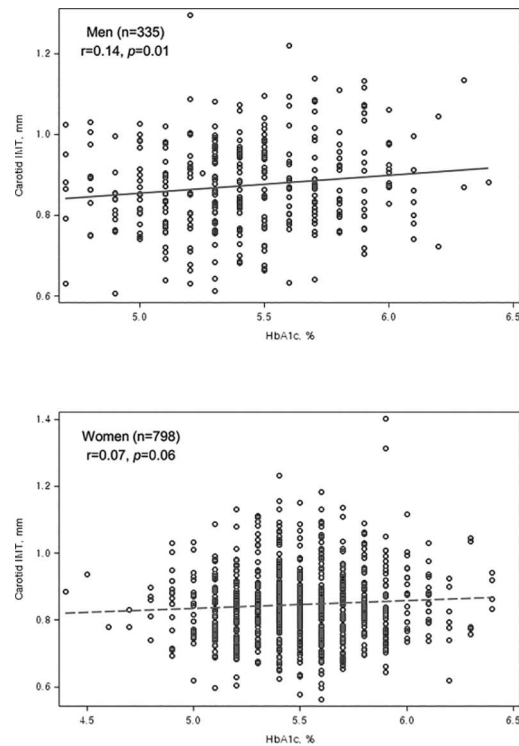

**Fig 1. Pearson correlation coefficient and *p* value between carotid IMT and HbA1c.**

doi:10.1371/journal.pone.0171761.g001

ankle pulse wave velocity[32]. A previous prospective study also reported that HbA1c was not related to carotid atherosclerosis[29]. This study included people with a < 110 mg/dL (6.1 mmol/L) fasting glucose level, whereas our study included people with fasting blood glucose less than 100 mg/dL (5.6 mmol/L) and HbA1c level below 6.5% (48 mmol/mol). According to our analyses, fasting glucose and insulin were not associated with carotid IMT in elderly population with normal fasting glucose. This finding may be attributed to the characteristics of our study subjects, whose average HOMA-IR was 1.1 [0.8–1.7], indicating a highly insulin sensitive condition. This value was much lower than that reported by Venkataraman et al. (HOMA-IR of 1.4 to 1.9)[28], despite a similar BMI distribution. In a previous study with 582 individuals aged 40–70 years without known diabetes, post-challenge plasma glucose presented a strong association with atherosclerosis, but fasting glucose and HbA1c levels did not have a significant association with atherosclerosis[30]. On the other hand, HbA1c had positive and significant associations with carotid IMT in our study. In a previous Korean study of diabetic patients, HbA1c was positively related to carotid plaques, but not with carotid IMT[33]. This previous study examined association between HbA1c, carotid atherosclerosis, arterial stiffness, and peripheral arterial disease among Korean patients with type 2 diabetes (n = 370) registered with the public health center. But we examined HbA1c and carotid IMT using a larger sample with relatively healthy community dweller.

Recent studies have shown that hyperglycemia may lead to arteriopathy by inducing oxidative stress, which facilitate the formation of advanced glycosylation end products[34]. Glycosylation end products are associated with glycation and susceptibility to LDL oxidation and subsequent uptake by macrophages, thereby creating foam cells[35], which is associated with atherosclerosis initiation. Macrophages are important factors in all atherosclerotic stages[36]. In diabetic patients, approximately 80% of deaths is caused by atherosclerosis[34]. Hyperglycemia

**Table 3. Association between HbA1c and carotid IMT.**

|                         | Unadjusted |       |                |         | Adjusted <sup>a</sup>            |       |         |
|-------------------------|------------|-------|----------------|---------|----------------------------------|-------|---------|
|                         | $\beta$    | SE    | R <sup>2</sup> | p value | $\beta$                          | SE    | p value |
| Total (n = 1,133)       |            |       |                |         |                                  |       |         |
| Sex, male               | - 0.027    | 0.007 | 0.013          | < .001  | - 0.031                          | 0.008 | < .001  |
| Age, 10 years           | 0.038      | 0.007 | 0.028          | < .001  | 0.025                            | 0.007 | < .001  |
| BMI, kg/m <sup>2</sup>  | 0.003      | 0.001 | 0.007          | 0.006   | 0.005                            | 0.001 | < .001  |
| HbA1c, %                | 0.026      | 0.010 | 0.006          | 0.009   | 0.020                            | 0.010 | 0.045   |
| SBP, 10 mmHg            | 0.009      | 0.002 | 0.018          | < .001  | 0.017                            | 0.003 | < .001  |
| DBP, 5 mmHg             | - 0.001    | 0.002 | < .001         | 0.527   | - 0.013                          | 0.003 | < .001  |
| Triglyceride, g/dL      | 0.135      | 0.053 | 0.006          | 0.011   | 0.113                            | 0.054 | 0.035   |
| LDL cholesterol, g/dL   | 0.289      | 0.107 | 0.006          | 0.007   | 0.345                            | 0.104 | 0.001   |
| HOMA-IR (logarithmic)   | < .001     | 0.006 | < .001         | 0.955   | - 0.007                          | 0.006 | 0.093   |
| CRP, mg/L (logarithmic) | 0.006      | 0.003 | 0.003          | 0.049   | 0.002                            | 0.003 | 0.463   |
| Current smoking         | - 0.019    | 0.006 | 0.010          | 0.001   | < .001                           | 0.014 | 0.979   |
| Current drinking        | - 0.001    | 0.007 | < .001         | 0.930   | - 0.003                          | 0.007 | 0.711   |
|                         |            |       |                |         | Adjusted R <sup>2</sup> = 0.0868 |       |         |
| Men (n = 335)           |            |       |                |         |                                  |       |         |
| Age, 10 years           | 0.045      | 0.012 | 0.041          | < .001  | 0.041                            | 0.013 | 0.002   |
| BMI, kg/m <sup>2</sup>  | 0.004      | 0.002 | 0.010          | 0.065   | 0.006                            | 0.003 | 0.008   |
| HbA1c, %                | 0.044      | 0.017 | 0.019          | 0.012   | 0.036                            | 0.017 | 0.040   |
| SBP, 10 mmHg            | 0.004      | 0.004 | 0.002          | 0.371   | 0.010                            | 0.005 | 0.076   |
| DBP, 5 mmHg             | - 0.007    | 0.004 | 0.012          | 0.049   | - 0.011                          | 0.005 | 0.023   |
| Triglyceride, g/dL      | 0.128      | 0.104 | 0.005          | 0.217   | 0.095                            | 0.108 | 0.372   |
| LDL cholesterol, g/dL   | 0.170      | 0.224 | 0.002          | 0.449   | 0.149                            | 0.220 | 0.497   |
| HOMA-IR (logarithmic)   | - 0.002    | 0.010 | < .001         | 0.814   | - 0.016                          | 0.012 | 0.070   |
| CRP, mg/L (logarithmic) | 0.002      | 0.006 | < .001         | 0.765   | - 0.001                          | 0.006 | 0.861   |
| Current smoking         | - 0.005    | 0.016 | < .001         | 0.756   | - 0.005                          | 0.016 | 0.753   |
| Current drinking        | - 0.029    | 0.012 | 0.017          | 0.018   | - 0.020                          | 0.012 | 0.094   |
|                         |            |       |                |         | Adjusted R <sup>2</sup> = 0.0797 |       |         |
| Women (n = 798)         |            |       |                |         |                                  |       |         |
| Age, 10 years           | 0.030      | 0.008 | 0.018          | < .001  | 0.016                            | 0.008 | 0.048   |
| BMI, kg/m <sup>2</sup>  | 0.003      | 0.001 | 0.009          | 0.008   | 0.004                            | 0.001 | 0.002   |
| HbA1c, %                | 0.023      | 0.012 | 0.005          | 0.058   | 0.013                            | 0.012 | 0.303   |
| SBP, 10 mmHg            | 0.011      | 0.002 | 0.025          | < .001  | 0.020                            | 0.004 | < .001  |
| DBP, 5 mmHg             | 0.001      | 0.002 | < .001         | 0.821   | - 0.014                          | 0.003 | < .001  |
| Triglyceride, g/dL      | 0.152      | 0.061 | 0.008          | 0.013   | 0.120                            | 0.062 | 0.051   |
| LDL cholesterol, g/dL   | 0.392      | 0.121 | 0.013          | 0.001   | 0.406                            | 0.118 | 0.001   |
| HOMA-IR (logarithmic)   | 0.003      | 0.007 | 0.001          | 0.447   | - 0.004                          | 0.008 | 0.408   |
| CRP, mg/L (logarithmic) | 0.008      | 0.004 | 0.005          | 0.049   | 0.005                            | 0.004 | 0.215   |
| Current smoking         | 0.026      | 0.030 | 0.001          | 0.381   | 0.032                            | 0.029 | 0.277   |
| Current drinking        | 0.002      | 0.009 | < .001         | 0.815   | 0.008                            | 0.008 | 0.370   |
|                         |            |       |                |         | Adjusted R <sup>2</sup> = 0.0771 |       |         |

<sup>a</sup>Adjusted for other variables in the table.

Abbreviations: BMI, body mass index; CRP, C-reactive protein; DBP, diastolic blood pressure; HOMA-IR, homeostasis model assessment of insulin resistance; IMT, intima-media thickness; LDL, low-density lipoprotein; SBP, systolic blood pressure; SE, standard error.

doi:10.1371/journal.pone.0171761.t003

is a well-known pathogenic factor of atherosclerosis as it leads to alteration of vascular tissue at the cellular level and consequent atherosclerotic disease[34]. In diabetes, these alterations are caused by nonenzymatic glycosylation of proteins and lipids. This glycosylation can cause dysfunction of protein and lipid by obstructing enzymatic activity and receptor recognition[37]. Furthermore, glycosylated proteins were associated with a specific receptor of cells related to the atherosclerotic process such as monocyte-derived macrophages, endothelial cells, and smooth muscle cells. Their interaction can increase production of oxidative stress and proinflammatory responses that promote the atherosclerotic process[34].

The mechanism linking HbA1c and carotid atherosclerosis has still not been fully elucidated. However, some potential mechanisms that may be responsible for these associations have been suggested. People who had a relatively higher level of fasting glucose within the normal range may have higher postprandial glucose levels, which may be reflected by HbA1c[38]. Furthermore, postprandial glucose levels are more closely associated with increased carotid atherosclerosis[39,40]. Moreover, even among people with normal fasting glucose, people who had a glycometabolism disorder were at risk for increased carotid atherosclerosis[41,42]. Although we could not verify this possibility because we did not measure post-prandial glucose levels, HbA1c can reflect glucose excursions after a meal. HbA1c could be a better indicator of glycometabolism disorder, because measurement errors and intra-individual variability are less than for fasting glucose and insulin. In addition to, current smoking and alcohol intake were more prevalent among men than women in our study. Previous studies reported that smoking may increase the risk of cardiovascular heart disease by promoting atherosclerosis progression[43] suggesting that enhanced inflammation and excessive vascular remodelling caused by smoking are contributing factors in the development of accelerated atherosclerosis [44].

Our findings suggest that the atherosclerotic process is common in people with normal fasting glucose levels, and a higher HbA1c may increase the risk of carotid atherosclerosis. Some previous studies reported that glycemic control, as reflected by level of HbA1c, was related to carotid IMT among people with diabetes[9].

Our study does have some limitations. First, the current study has limitation due to its cross-sectional design. It was not possible to explain the causal relationship between HbA1c levels and carotid atherosclerosis. Second, it may not be appropriate to generalize it to another ethnic or age group because the study was performed with elderly Koreans. Third, as we could not conduct an oral glucose tolerance test, participants with diabetes or impaired fasting glucose could be misclassified as normal. Misclassification, if any, would be expected to bias our study results toward the null value. Thus, our study showed probably conservative results, and null findings of the previous studies can be partially explained by this potential misclassification.

Nevertheless, our study has several distinct strengths. The study population consists of rather homogenous and large numbered elderly people. In addition, we focused on elderly people in a metabolically healthy condition for the purpose of investigating the association between HbA1c and carotid IMT. As the study population was rather lean, insulin-sensitive and had lower blood pressure and LDL levels, we can exclude the effect of these confounding factors that can affect the progression of atherosclerosis.

## Conclusions

Our study showed that increased HbA1c levels are positively related to carotid atherosclerosis assessed by carotid IMT in an aged people with normoglycemia. Atherosclerotic risk seemed to increase linearly according to HbA1c levels, even within normoglycemic individuals. HbA1c level within the normal fasting glucose range may serve as a subclinical marker of



carotid atherosclerosis in an elderly population. Fasting glucose is insufficient to verify atherosclerotic cardiovascular disease risk in an elderly population based on our study. Post-prandial glucose testing is difficult to carry out, especially in an elderly population, and requires more time and cost than a simple HbA1c test. In an elderly population, HbA1c level is a more effective and informative marker for high-risk atherosclerotic cardiovascular disease screening.

## Supporting information

**S1 Table. Minimal data set.**  
(XLSX)

## Acknowledgments

SWL contributed to the study hypothesis, data collection, analysis and interpretation of the data, and wrote the first draft of the manuscript. HCK contributed to study hypothesis and design, data collection, analysis and interpretation of the data and reviewed a draft of the manuscript. YHL contributed to the interpretation of the data and reviewed a draft of the manuscript. BMS, HC and JHP contributed to data collection and discussion. YR and COK contributed to the study design, data collection, data analysis, and interpretation of the data. All authors reviewed the manuscript prior to submission.

## Author contributions

**Conceptualization:** SWL HCK.

**Data curation:** SWL HCK BMS HC JHP COK.

**Formal analysis:** SWL HCK.

**Funding acquisition:** HCK YR COK.

**Investigation:** SWL HCK.

**Methodology:** SWL HCK YL.

**Project administration:** HCK YL COK.

**Resources:** HCK YR COK.

**Supervision:** HCK.

**Validation:** SWL HCK YL.

**Visualization:** SWL HCK.

**Writing – original draft:** SWL HCK.

**Writing – review & editing:** SWL HCK YL BMS HC JHP YR COK.

## References

1. Marshall S, Barth J. Standardization of HbA1c measurements— a consensus statement. *Diabetic Medicine*. 2000; 17: 5–6 PMID: [10691152](#)
2. Selvin E, Marinopoulos S, Berkenblit G, Rami T, Brancati FL, Powe NR, et al. Meta-analysis: glycosylated hemoglobin and cardiovascular disease in diabetes mellitus. *Annals of internal medicine*. 2004; 141: 421–431 PMID: [15381515](#)

3. Khaw K-T, Wareham N, Luben R, Bingham S, Oakes S, Welch A, et al. Glycated haemoglobin, diabetes, and mortality in men in Norfolk cohort of European Prospective Investigation of Cancer and Nutrition (EPIC-Norfolk). *Bmj*. 2001; 322: 15 PMID: [11141143](#)
4. Singer DE, Nathan DM, Anderson KM, Wilson PW, Evans JC. Association of HbA1c with prevalent cardiovascular disease in the original cohort of the Framingham Heart Study. *Diabetes*. 1992; 41: 202–208 PMID: [1733810](#)
5. Hirai FE, Moss SE, Klein BE, Klein R. Relationship of Glycemic Control, Exogenous Insulin, and C-Peptide Levels to Ischemic Heart Disease Mortality Over a 16-Year Period in People With Older-Onset Diabetes The Wisconsin Epidemiologic Study of Diabetic Retinopathy (WESDR). *Diabetes care*. 2008; 31: 493–497 doi: [10.2337/dc07-1161](#) PMID: [18025409](#)
6. Group UPDS. Intensive blood-glucose control with sulphonylureas or insulin compared with conventional treatment and risk of complications in patients with type 2 diabetes (UKPDS 33). *The Lancet*. 1998; 352: 837–853
7. McNeely MJ, McClelland RL, Bild DE, Jacobs DR, Tracy RP, Cushman M, et al. The Association Between A1C and Subclinical Cardiovascular Disease The Multi-Ethnic Study of Atherosclerosis. *Diabetes Care*. 2009; 32: 1727–1733 doi: [10.2337/dc09-0074](#) PMID: [19549732](#)
8. Hung CS, Lee Pc, Li HY, Ma WY, Lin MS, Wei JN, et al. Haemoglobin A1c is associated with carotid intima-media thickness in a Chinese population. *Clinical endocrinology*. 2011; 75: 780–785 doi: [10.1111/j.1365-2265.2011.04129.x](#) PMID: [21668461](#)
9. Selvin E, Coresh J, Golden SH, Boland LL, Brancati FL, Steffes MW. Glycemic control, atherosclerosis, and risk factors for cardiovascular disease in individuals with diabetes the atherosclerosis risk in communities study. *Diabetes Care*. 2005; 28: 1965–1973 PMID: [16043740](#)
10. Pignoli P, Tremoli E, Poli A, Oreste P, Paoletti R. Intimal plus medial thickness of the arterial wall: a direct measurement with ultrasound imaging. *circulation*. 1986; 74: 1399–1406 PMID: [3536154](#)
11. Bots ML, Mulder PG, Hofman A, van Es G-A, Grobbee DE. Reproducibility of carotid vessel wall thickness measurements. The Rotterdam Study. *Journal of clinical epidemiology*. 1994; 47: 921–930 PMID: [7730896](#)
12. Persson J, Stavenow L, Wikstrand J, Israelsson B, Formgren J, Berglund G. Noninvasive quantification of atherosclerotic lesions. Reproducibility of ultrasonographic measurement of arterial wall thickness and plaque size. *Arteriosclerosis, Thrombosis, and Vascular Biology*. 1992; 12: 261–266
13. Bots ML, Hoes AW, Koudstaal PJ, Hofman A, Grobbee DE. Common carotid intima-media thickness and risk of stroke and myocardial infarction the Rotterdam Study. *Circulation*. 1997; 96: 1432–1437 PMID: [9315528](#)
14. O'Leary DH, Polak JF, Kronmal RA, Manolio TA, Burke GL, Wolfson SK Jr. Carotid-artery intima and media thickness as a risk factor for myocardial infarction and stroke in older adults. *New England Journal of Medicine*. 1999; 340: 14–22
15. Mohan V, Ravikumar R, Rani SS, Deepa R. Intimal medial thickness of the carotid artery in South Indian diabetic and non-diabetic subjects: the Chennai Urban Population Study (CUPS). *Diabetologia*. 2000; 43: 494–499 doi: [10.1007/s001250051334](#) PMID: [10819244](#)
16. Simsek E, Balta H, Balta Z, Dallar Y. Childhood obesity-related cardiovascular risk factors and carotid intima-media thickness. *The Turkish journal of pediatrics*. 2010; 52: 602 PMID: [21428192](#)
17. Blankenhorn D, Selzer R, Crawford D, Barth J, Liu C, Liu C, et al. Beneficial effects of colestipol-niacin therapy on the common carotid artery. Two-and four-year reduction of intima-media thickness measured by ultrasound. *Circulation*. 1993; 88: 20–28 PMID: [8319334](#)
18. Furberg CD, Adams HP, Applegate WB, Byington RP, Espeland MA, Hartwell T, et al. Effect of lovastatin on early carotid atherosclerosis and cardiovascular events. Asymptomatic Carotid Artery Progression Study (ACAPS) Research Group. *Circulation*. 1994; 90: 1679–1687
19. Lee EY, Kim HC, Rhee Y, Youm Y, Kim KM, Lee JM, et al. The Korean urban rural elderly cohort study: study design and protocol. *BMC geriatrics*. 2014; 14: 33 doi: [10.1186/1471-2318-14-33](#) PMID: [24641351](#)
20. Song BM, Rhee Y, Kim CO, Youm Y, Kim KM, Lee EY, et al. Urban-Rural Differences Explain the Association between Serum 25-Hydroxyvitamin D Level and Insulin Resistance in Korea. *Nutrients*. 2014; 6: 5806–5818 doi: [10.3390/nu6125806](#) PMID: [25514561](#)
21. Song BM, Kim HC, Rhee Y, Youm Y, Kim CO. Association between serum 25-hydroxyvitamin D concentrations and depressive symptoms in an older Korean population: a cross-sectional study. *Journal of affective disorders*. 2016; 189: 357–364 doi: [10.1016/j.jad.2015.09.043](#) PMID: [26476420](#)
22. Choi H, Kim HC, Song BM, Park JH, Lee J-M, Yoon D-L, et al. Serum uric acid concentration and metabolic syndrome among elderly Koreans: The Korean Urban Rural Elderly (KURE) study. *Archives of gerontology and geriatrics*. 2016; 64: 51–58 doi: [10.1016/j.archger.2016.01.005](#) PMID: [26952377](#)

23. Lee J-M, Kim HC, Kang JI, Suh I. Association between stressful life events and resting heart rate. *BMC psychology*. 2014; 2: 1
24. De Groot E, Van Leuven SI, Duivenvoorden R, Meuwese MC, Akdim F, Bots ML, et al. Measurement of carotid intima-media thickness to assess progression and regression of atherosclerosis. *Nature clinical practice Cardiovascular medicine*. 2008; 5: 280–288 doi: [10.1038/ncpcardio.1163](https://doi.org/10.1038/ncpcardio.1163) PMID: [18332891](https://pubmed.ncbi.nlm.nih.gov/18332891/)
25. Lee JH, Choi DP, Shim J-S, Kim DJ, Park S-H, Kim HC. Inter-Rater Reliability of Carotid Intima-Media Thickness Measurements in a Multicenter Cohort Study. *Journal of Health Informatics and Statistics*. 2016; 41: 49–56
26. Matthews D, Hosker J, Rudenski A, Naylor B, Treacher D, Turner R. Homeostasis model assessment: insulin resistance and  $\beta$ -cell function from fasting plasma glucose and insulin concentrations in man. *Diabetologia*. 1985; 28: 412–419 PMID: [3899825](https://pubmed.ncbi.nlm.nih.gov/3899825/)
27. Friedewald WT, Levy RI, Fredrickson DS. Estimation of the concentration of low-density lipoprotein cholesterol in plasma, without use of the preparative ultracentrifuge. *Clinical chemistry*. 1972; 18: 499–502 PMID: [4337382](https://pubmed.ncbi.nlm.nih.gov/4337382/)
28. Venkataraman V, Amutha A, Anbalagan VP, Deepa M, Anjana RM, Unnikrishnan R, et al. Association of glycated hemoglobin with carotid intimal medial thickness in Asian Indians with normal glucose tolerance. *Journal of Diabetes and its Complications*. 2012; 26: 526–530 doi: [10.1016/j.jdiacomp.2012.06.002](https://doi.org/10.1016/j.jdiacomp.2012.06.002) PMID: [22795336](https://pubmed.ncbi.nlm.nih.gov/22795336/)
29. Bonora E, Kiechl S, Willeit J, Oberhollenzer F, Egger G, Bonadonna R, et al. Plasma glucose within the normal range is not associated with carotid atherosclerosis: prospective results in subjects with normal glucose tolerance from the Bruneck Study. *Diabetes Care*. 1999; 22: 1339–1346 PMID: [10480780](https://pubmed.ncbi.nlm.nih.gov/10480780/)
30. Temelkova-Kurktschiev TS, Koehler C, Henkel E, Leonhardt W, Fuecker K, Hanefeld M. Postchallenge plasma glucose and glycemic spikes are more strongly associated with atherosclerosis than fasting glucose or HbA1c level. *Diabetes care*. 2000; 23: 1830–1834 PMID: [11128361](https://pubmed.ncbi.nlm.nih.gov/11128361/)
31. Bobbert T, Mai K, Fischer-Rosinsky A, Pfeiffer AF, Spranger J. A1C is associated with intima-media thickness in individuals with normal glucose tolerance. *Diabetes Care*. 2010; 33: 203–204 doi: [10.2337/dc09-1009](https://doi.org/10.2337/dc09-1009) PMID: [19808917](https://pubmed.ncbi.nlm.nih.gov/19808917/)
32. Lee Y-H, Shin M-H, Choi J-S, Rhee J-A, Nam H-S, Jeong S-K, et al. HbA1c is significantly associated with arterial stiffness but not with carotid atherosclerosis in a community-based population without type 2 diabetes: The Dong-gu study. *Atherosclerosis*. 2016; 247: 1–6 doi: [10.1016/j.atherosclerosis.2016.01.032](https://doi.org/10.1016/j.atherosclerosis.2016.01.032) PMID: [26854970](https://pubmed.ncbi.nlm.nih.gov/26854970/)
33. Choi S-W, Shin M-H, Yun W-J, Kim H-Y, Lee Y-H, Kweon S-S, et al. Association between hemoglobin A 1c, carotid atherosclerosis, arterial stiffness, and peripheral arterial disease in Korean type 2 diabetic patients. *Journal of Diabetes and its Complications*. 2011; 25: 7–13 doi: [10.1016/j.jdiacomp.2009.12.001](https://doi.org/10.1016/j.jdiacomp.2009.12.001) PMID: [20106681](https://pubmed.ncbi.nlm.nih.gov/20106681/)
34. Aronson D, Rayfield EJ. How hyperglycemia promotes atherosclerosis: molecular mechanisms. *Cardiovascular Diabetology*. 2002; 1: 1 doi: [10.1186/1475-2840-1-1](https://doi.org/10.1186/1475-2840-1-1) PMID: [12119059](https://pubmed.ncbi.nlm.nih.gov/12119059/)
35. Bowie A, Owens D, Collins P, Johnson A, Tomkin GH. Glycosylated low density lipoprotein is more sensitive to oxidation: implications for the diabetic patient? *Atherosclerosis*. 1993; 102: 63–67 PMID: [8257453](https://pubmed.ncbi.nlm.nih.gov/8257453/)
36. Chistiakov DA, Bobryshev YV, Orekhov AN. Macrophage-mediated cholesterol handling in atherosclerosis. *Journal of Cellular and Molecular Medicine*. 2015:
37. Chen L, Zhu W, Mai L, Fang L, Ying K. The association of metabolic syndrome and its components with brachial-ankle pulse wave velocity in south China. *Atherosclerosis*. 2015; 240: 345–350 doi: [10.1016/j.atherosclerosis.2015.03.031](https://doi.org/10.1016/j.atherosclerosis.2015.03.031) PMID: [25875386](https://pubmed.ncbi.nlm.nih.gov/25875386/)
38. Monnier L, Colette C, Monnier L, Colette C. Contributions of fasting and postprandial glucose to hemoglobin A1c. *Endocrine Practice*. 2006; 12: 42–46 doi: [10.4158/EP.12.S1.42](https://doi.org/10.4158/EP.12.S1.42) PMID: [16627379](https://pubmed.ncbi.nlm.nih.gov/16627379/)
39. Tominaga M, Eguchi H, Manaka H, Igarashi K, Kato T, Sekikawa A. Impaired glucose tolerance is a risk factor for cardiovascular disease, but not impaired fasting glucose. The Funagata Diabetes Study. *Diabetes care*. 1999; 22: 920–924 PMID: [10372242](https://pubmed.ncbi.nlm.nih.gov/10372242/)
40. Succurro E, Marini M, Arturi F, Grembiale A, Lugara M, Andreozzi F, et al. Elevated one-hour post-load plasma glucose levels identifies subjects with normal glucose tolerance but early carotid atherosclerosis. *Atherosclerosis*. 2009; 207: 245–249 doi: [10.1016/j.atherosclerosis.2009.04.006](https://doi.org/10.1016/j.atherosclerosis.2009.04.006) PMID: [19410252](https://pubmed.ncbi.nlm.nih.gov/19410252/)
41. Vitelli LL, Shahar E, Heiss G, McGovern PG, Brancati FL, Eckfeldt JH, et al. Glycosylated hemoglobin level and carotid intimal-medial thickening in nondiabetic individuals: the Atherosclerosis Risk in Communities Study. *Diabetes Care*. 1997; 20: 1454–1458 PMID: [9283796](https://pubmed.ncbi.nlm.nih.gov/9283796/)
42. Jørgensen L, Jenssen T, Joakimsen O, Heuch I, Ingebretsen OC, Jacobsen BK. Glycated Hemoglobin Level Is Strongly Related to the Prevalence of Carotid Artery Plaques With High Echogenicity in

Nondiabetic Individuals The Tromsø Study. *Circulation*. 2004; 110: 466–470 doi: [10.1161/01.CIR.0000136809.55141.3B](https://doi.org/10.1161/01.CIR.0000136809.55141.3B) PMID: [15249512](https://pubmed.ncbi.nlm.nih.gov/15249512/)

43. Howard G, Wagenknecht LE, Burke GL, Diez-Roux A, Evans GW, McGovern P, et al. Cigarette smoking and progression of atherosclerosis: The Atherosclerosis Risk in Communities (ARIC) Study. *Jama*. 1998; 279: 119–124 PMID: [9440661](https://pubmed.ncbi.nlm.nih.gov/9440661/)
44. Lee J, Taneja V, Vassallo R. Cigarette smoking and inflammation cellular and molecular mechanisms. *Journal of dental research*. 2012; 91: 142–149. doi: [10.1177/0022034511421200](https://doi.org/10.1177/0022034511421200) PMID: [21876032](https://pubmed.ncbi.nlm.nih.gov/21876032/)
